# Supplementary material for: Disruption of orbitofrontal-hypothalamic projections in a murine ALS model and in human patients
Source: Springer Nature journal article supplement (doi:10.1186/s40035-021-00241-6), 2021-05-31
Supplement: MOESM1 [file 19213334]

**Table S1:** Anatomical landmarks used to map brain sections along the anterior-posterior axis.

| <b>Coordinate from bregma</b> | <b>Anatomical landmark</b>                                | <b>Section in Allen's brain atlas</b> |
|-------------------------------|-----------------------------------------------------------|---------------------------------------|
| 2.6                           | first section without AOB                                 | 27                                    |
| 2.2                           | section before beginning of DP                            | 32                                    |
| 2.1                           | first section with DP                                     | 33                                    |
| 1.6                           | shape of fa                                               | 38                                    |
| 1.5                           | shape of fa                                               | 39                                    |
| 1.4                           | shape of fa                                               | 40                                    |
| 1.2                           | shape of fa                                               | 42                                    |
| 1.1                           | shape of fa                                               | 43                                    |
| 1                             | shape of ccg                                              | 44                                    |
| 0.2                           | shape of aco                                              | 52                                    |
| 0.1                           | shape of aco                                              | 53                                    |
| 0                             | shape of aco and act                                      | 54                                    |
| -0.3                          | first section with SCH<br>last section without NLOT       | 57                                    |
| -1                            | shape of opt<br>last section with NLOT                    | 64                                    |
| -1.4                          | first section with ME<br>shape of otp and int             | 69                                    |
| -2.2                          | first section without ME<br>first section with ventral DG | 76                                    |
| -2.5                          | Expansion of CA3so                                        | 79                                    |
| -3.1                          | last section with MM                                      | 85                                    |

The following structures provided distinctive optical characteristics for mapping: AOB = Accessory olfactory bulb; DP = Dorsal peduncular area; fa = corpus callosum, anterior forceps; ccg = genu of corpus callosum; aco = anterior commissure, olfactory limb; act = anterior commissure, temporal limb; SCH = Suprachiasmatic nucleus; NLOT = Nucleus of the lateral olfactory tract; ME = Median eminence; opt = optic tract; int = internal capsule; DG = Dentate gyrus; CA3so = Field CA3, stratum oriens; MM = Medial mammillary nucleus.

**Table S2:** List of brain structures projecting to the LHA.

|             | <b>Ipsilateral raw data</b> | <b>Contralateral raw data</b> | <b>Ipsilateral normalized</b> | <b>Contralateral normalized</b> |
|-------------|-----------------------------|-------------------------------|-------------------------------|---------------------------------|
| <b>A13</b>  | 85.6, $\pm$ 45.9            | 10.4, $\pm$ 6.6               | 58.5, $\pm$ 28.2              | 7.1, $\pm$ 3.8                  |
| <b>AAA</b>  | 297.6, $\pm$ 230.0          | 18.8, $\pm$ 7.2               | 225.3, $\pm$ 128.1            | 16.3, $\pm$ 7.4                 |
| <b>ACA</b>  | 2686.2, $\pm$ 1373.5        | 897.0, $\pm$ 468.9            | 1826.0, $\pm$ 538.9           | 599.4, $\pm$ 232.6              |
| <b>ACB</b>  | 565.4, $\pm$ 375.1          | 9.4, $\pm$ 10.1               | 411.8, $\pm$ 173.1            | 7.9, $\pm$ 6.9                  |
| <b>ADP</b>  | 64.4, $\pm$ 27.3            | 16.6, $\pm$ 8.6               | 48.3, $\pm$ 10.8              | 12.5, $\pm$ 4.1                 |
| <b>AHN</b>  | 1174.0, $\pm$ 1241.1        | 111.4, $\pm$ 91.1             | 909.7, $\pm$ 1146.0           | 84.7, $\pm$ 77.7                |
| <b>AI</b>   | 1437.8, $\pm$ 1365.3        | 197.0, $\pm$ 177.6            | 935.9, $\pm$ 622.2            | 117.2, $\pm$ 82.2               |
| <b>AON</b>  | 92.2, $\pm$ 90.1            | 6.2, $\pm$ 4.4                | 64.6, $\pm$ 41.4              | 4.1, $\pm$ 1.6                  |
| <b>APN</b>  | 54.2, $\pm$ 43.3            | 5.4, $\pm$ 1.7                | 35.4, $\pm$ 19.1              | 5.7, $\pm$ 4.8                  |
| <b>AUD</b>  | 228.6, $\pm$ 246.6          | 62.2, $\pm$ 48.6              | 138.4, $\pm$ 129.3            | 38.0, $\pm$ 27.4                |
| <b>AVP</b>  | 207.8, $\pm$ 99.8           | 71.6, $\pm$ 36.0              | 143.2, $\pm$ 41.5             | 49.3, $\pm$ 22.1                |
| <b>AVPV</b> | 242.0, $\pm$ 43.6           | 71.2, $\pm$ 31.5              | 216.0, $\pm$ 99.8             | 70.5, $\pm$ 57.7                |
| <b>BLA</b>  | 1263.0, $\pm$ 670.4         | 79.6, $\pm$ 56.3              | 920.2, $\pm$ 278.5            | 52.6, $\pm$ 28.0                |
| <b>BMA</b>  | 1405.0, $\pm$ 744.5         | 110.4, $\pm$ 67.5             | 1009.6, $\pm$ 381.6           | 77.4, $\pm$ 37.9                |
| <b>BST</b>  | 2108.8, $\pm$ 774.0         | 275.6, $\pm$ 165.1            | 1613.9, $\pm$ 236.4           | 188.0, $\pm$ 82.2               |
| <b>CEA</b>  | 440.4, $\pm$ 315.9          | 14.4, $\pm$ 6.8               | 292.6, $\pm$ 129.9            | 12.6, $\pm$ 7.0                 |
| <b>CLA</b>  | 20.0, $\pm$ 11.5            | 4.4, $\pm$ 2.2                | 14.8, $\pm$ 4.9               | 3.8, $\pm$ 2.1                  |
| <b>CM</b>   | 132.8, $\pm$ 65.5           | 49.2, $\pm$ 18.7              | 97.1, $\pm$ 40.2              | 37.5, $\pm$ 7.1                 |
| <b>COA</b>  | 730.4, $\pm$ 377.3          | 39.2, $\pm$ 31.1              | 539.2, $\pm$ 179.2            | 25.4, $\pm$ 17                  |
| <b>CP</b>   | 814.4, $\pm$ 499.4          | 34.8, $\pm$ 21.2              | 581.7, $\pm$ 185.8            | 23.0, $\pm$ 7.0                 |
| <b>DMH</b>  | 1510.0, $\pm$ 729.1         | 233.8, $\pm$ 115.7            | 1039.7, $\pm$ 290.7           | 160.3, $\pm$ 50                 |
| <b>DP</b>   | 618.4, $\pm$ 249.1          | 192.2, $\pm$ 128.9            | 535.8, $\pm$ 289.4            | 131.5, $\pm$ 54.3               |

|             |                 |                |                 |               |
|-------------|-----------------|----------------|-----------------|---------------|
| <b>ECT</b>  | 255.8, ±139.4   | 79.0, ±50.1    | 172.5, ±48.9    | 50.5, ±26.3   |
| <b>ENTI</b> | 144.8, ±96.2    | 28.6, ±18.1    | 98.2, ±46.0     | 18.1, ±10.3   |
| <b>EP</b>   | 252.0, ±241.5   | 9.4, ±8.1      | 175.9, ±109.7   | 5.8, ±4.8     |
| <b>FS</b>   | 59.8, ±45.7     | 1.0, ±0.9      | 48.2, ±31.9     | 0.7, ±0.7     |
| <b>GP</b>   | 133.8, ±83.9    | 9.8, ±10.7     | 90.2, ±27.0     | 6.0, ±5.3     |
| <b>GU</b>   | 503.2, ±399.3   | 77.0, ±63.8    | 343.9, ±186.6   | 49.7, ±28.3   |
| <b>IA</b>   | 127.4, ±90.9    | 8.0, ±5.8      | 92.8, ±70.4     | 6.5, ±5.0     |
| <b>ILA</b>  | 2627.2, ±896.1  | 1192.2, ±548.6 | 2089.0, ±476.3  | 834.9, ±188.3 |
| <b>IMD</b>  | 145.8, ±74.4    | 55.8, ±29.8    | 103.6, ±34.6    | 37.5, ±11.9   |
| <b>LH</b>   | 188.4, ±99.4    | 32.6, ±17.2    | 127.9, ±41.1    | 21.8, ±9.0    |
| <b>LHA</b>  | Injection       | 845.8, ±509.0  | Injection       | 573.8, ±167.2 |
| <b>LPO</b>  | 1251.6, ±447.7  | 173.2, ±113.4  | 1000.5, ±271.0  | 120.5, ±51.3  |
| <b>LS</b>   | 1453.4, ±583.2  | 179.6, ±78.9   | 1169.3, ±436.5  | 127.3, ±23.3  |
| <b>MA</b>   | 139.6, ±177.3   | 5.8, ±4.1      | 97.8, ±90.1     | 6.0, ±6.1     |
| <b>MEA</b>  | 712.8, ±691.0   | 72.4, ±103.5   | 499.2, ±437.3   | 46.6, ±66.8   |
| <b>MEPO</b> | 252.8, ±96.0    | 204.6, ±71.7   | 207.2, ±71.9    | 169.9, ±57.2  |
| <b>MM</b>   | 126.0, ±105.5   | 55.2, ±49.2    | 86.8, ±54.7     | 36.4, ±29.1   |
| <b>MOp</b>  | 1006.4, ±1321.7 | 71.6, ±74.0    | 576.5, ±705.8   | 40.4, ±38.2   |
| <b>MOs</b>  | 2292.6, ±2310.5 | 273.6, ±224.4  | 1391.5, ±1146.2 | 168.8, ±103.4 |
| <b>MPN</b>  | 701.2, ±246.6   | 177.2, ±104.2  | 551.6, ±124.7   | 121.4, ±56.4  |
| <b>MPO</b>  | 1752.4, ±543.1  | 436.4, ±213.4  | 1384.5, ±259.7  | 306.7, ±83.4  |
| <b>MS</b>   | 323.0, ±157.8   | 58.4, ±29.3    | 240.5, ±56.7    | 47.0, ±16.7   |
| <b>NDB</b>  | 288.2, ±281.3   | 34.4, ±24.5    | 202.7, ±126.0   | 24.7, ±20.6   |
| <b>NLOT</b> | 74.0, ±40.3     | 8.0, ±5.4      | 55.9, ±20.7     | 5.5, ±3.1     |
| <b>OLF</b>  | 125.4, ±76.6    | 19.0, ±11.4    | 97.4, ±39.3     | 13.5, ±4.9    |

|              |                |               |                |               |
|--------------|----------------|---------------|----------------|---------------|
| <b>ORBI</b>  | 306.6, ±425.5  | 41.8, ±68.5   | 168.7, ±213.7  | 22.7, ±34.6   |
| <b>ORBm</b>  | 515.4, ±261.3  | 142.6, ±120.6 | 421.2, ±183.3  | 104.2, ±53.7  |
| <b>ORBvl</b> | 184.8, ±193.9  | 31.4, ±42.7   | 110.2, ±90.7   | 18.6, ±20.7   |
| <b>OT</b>    | 58.4, ±74.6    | 1.8, ±1.7     | 37.9, ±35.2    | 1.5, ±1.0     |
| <b>OV</b>    | 28.2, ±9.0     | 17.2, ±4.2    | 24.9, ±12.4    | 16.2, ±9.8    |
| <b>PA</b>    | 398.4, ±541.0  | 156.2, ±271.9 | 252.9, ±347.2  | 99.8, ±175.5  |
| <b>PAA</b>   | 31.2, ±11.4    | 2.6, ±0.8     | 25.3, ±7.4     | 2.5, ±1.5     |
| <b>PD</b>    | 17.8, ±7.0     | 3.6, ±3.8     | 14.7, ±5.9     | 2.6, ±2.3     |
| <b>PERI</b>  | 235.0, ±141.4  | 60.8, ±34.0   | 156.4, ±61.6   | 39.9, ±15.5   |
| <b>PH</b>    | 1304.0, ±428.6 | 662.0, ±209.6 | 1043.6, ±248.9 | 528.6, ±123.8 |
| <b>PIR</b>   | 667.0, ±677.1  | 27.0, ±12.9   | 444.4, ±302.3  | 20.2, ±6.7    |
| <b>PL</b>    | 1576.0, ±554.1 | 653.6, ±330.0 | 1239.8, ±254.5 | 466.9, ±93.6  |
| <b>PS</b>    | 33.2, ±20.0    | 2.8, ±2.5     | 22.2, ±6.3     | 1.8, ±1.5     |
| <b>PST</b>   | 37.0, ±26.9    | 4.0, ±4.6     | 41.3, ±47.5    | 2.9, ±2.5     |
| <b>PSTN</b>  | 160.2, ±59.7   | 16.6, ±12.9   | 168.5, ±158.2  | 11.4, ±5.6    |
| <b>PTL</b>   | 199.4, ±198.2  | 17.0, ±11.1   | 121.9, ±104.4  | 11.2, ±5.0    |
| <b>PV</b>    | 239.8, ±164.1  | 46.2, ±27.2   | 171.9, ±111.7  | 34.1, ±14.2   |
| <b>PVH</b>   | 449.2, ±210.4  | 72.4, ±46.7   | 339.2, ±164.4  | 50.9, ±33.3   |
| <b>PVT</b>   | 960.4, ±475.5  | 332.4, ±231.1 | 686.5, ±334.9  | 242.4, ±193.1 |
| <b>RE</b>    | 461.0, ±379.7  | 176.4, ±122.5 | 356.0, ±347.2  | 134.9, ±109.3 |
| <b>RSP</b>   | 331.8, ±297.9  | 47.6, ±32.1   | 198.7, ±152.4  | 30.7, ±15.4   |
| <b>SF</b>    | 57.8, ±32.7    | 13.6, ±6.0    | 41.9, ±21.1    | 9.7, ±3.6     |
| <b>SI</b>    | 1278.0, ±723.9 | 71.8, ±65.0   | 982.8, ±364.2  | 46.3, ±28.1   |
| <b>SS</b>    | 700.6, ±860.7  | 57.4, ±49.5   | 407.5, ±454    | 40.5, ±25.0   |
| <b>STN</b>   | 124.4, ±78.1   | 20.0, ±11.8   | 116.4, ±96.7   | 13.2, ±5.1    |

|             |                |               |                |               |
|-------------|----------------|---------------|----------------|---------------|
| <b>SUM</b>  | 475.2, ±235.5  | 211.4, ±145.1 | 370.8, ±110.8  | 144.5, ±54.0  |
| <b>TEa</b>  | 205.6, ±122.0  | 78.6, ±58.0   | 136.7, ±45.9   | 49.3, ±29.6   |
| <b>TRS</b>  | 27.8, ±18.0    | 20.4, ±19.1   | 24.1, ±16.7    | 14.6, ±11.3   |
| <b>TT</b>   | 929.4, ±512.0  | 214.6, ±194.3 | 802.0, ±531.2  | 131.0, ±95.0  |
| <b>TU</b>   | 531.4, ±445.1  | 60.8, ±36.4   | 353.3, ±263.6  | 41.7, ±18.4   |
| <b>VIS</b>  | 68.4, ±49.9    | 5.0, ±4.1     | 42.7, ±26.3    | 3.6, ±3.7     |
| <b>VISC</b> | 138.6, ±109.1  | 22.0, ±21.0   | 86.0, ±49.0    | 14.3, ±9.3    |
| <b>VLPO</b> | 57.4, ±30.1    | 17.8, ±15.3   | 40.3, ±11.4    | 11.3, ±9.3    |
| <b>VM</b>   | 821.2, ±745.3  | 84.8, ±34.6   | 523.4, ±351.8  | 63.8, ±20.3   |
| <b>VMH</b>  | 1462.6, ±799.9 | 187.4, ±149.2 | 1004.7, ±629.3 | 137.7, ±133.4 |
| <b>VP</b>   | 163.2, ±158.4  | 28.0, ±12.4   | 110.7, ±75.8   | 21.4, ±5.6    |
| <b>ZI</b>   | 1829.0, ±912.2 | 263.0, ±107.7 | 1374.4, ±334.2 | 194.9, ±34.7  |

For each structure, the absolute number of neurons projecting to LHA is reported as mean ± SD and independently for ipsi- and contralateral hemispheres. Normalization for a total of 50k projecting neurons is also provided for ipsilateral and contralateral counts.
